# Supplementary material for: Identification and molecular characterization of Mycobacterium bovis DNA in GeneXpert® MTB/RIF ultra-positive, culture-negative sputum from a rural community in South Africa
Source: PubMed Central journal article supplement (PMC10937233; doi:10.1016/j.onehlt.2024.100702), 2024-03-03
Supplement: mmc7.pdf [file mmc7.pdf]

# MinION Mk1C (MC-114017) Final report

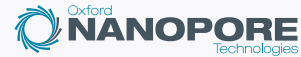

07 Aug 23, 08:16 — 08 Aug 23, 00:42 · 20230807\_AHRI5sigsputumzTB · no\_sample · MC-114017

Protocol run ID: f8863b05-eca8-4225-ac76-2fc426a8f9f8

[Run summary](#) | [Run configuration](#) | [Sequence output](#) | [Run health](#) | [Run log](#)

## Run summary

### DATA OUTPUT

Estimated bases

3.37 Gb

Data produced

90.43 GB

Reads generated

5.6 M

Estimated N50

873

### RUN DURATION

Elapsed time

80 hours of 80 hours

Run status

**Stopped by user**[View unit abbreviations used in this report](#)

### BASECALLING

Reads called

100%

Bases called (min Q score: 9)

2.9 Gb

335.32 Mb

Pass

Fail

## Run configuration

### RUN SETUP

|                      |               |
|----------------------|---------------|
| Flow cell type       | FLO-MIN114    |
| Flow cell type alias | FLO-MIN114    |
| Flow cell ID         | FAW08908      |
| Kit type             | SQK-NBD114-96 |

### RUN SETTINGS

|                            |                              |
|----------------------------|------------------------------|
| Specified run length       | 80 hrs                       |
| Active channel selection   | On                           |
| Pore scan freq.            | 1.5 hrs                      |
| Reserved pores             | On                           |
| Minimum read length        | 20 bp                        |
| Read splitting             | On                           |
| Basecalling                | High-accuracy model, 260 bps |
| Modified basecalling       | Off                          |
| Trim barcodes              | Off                          |
| Mid-read barcode filtering | Off                          |

### DATA OUTPUT SETTINGS

|                      |                                                                                                       |
|----------------------|-------------------------------------------------------------------------------------------------------|
| FAST5 output         | vbz_compress                                                                                          |
| FAST5 reads per file | 4000                                                                                                  |
| FASTQ output         | gzip_compress                                                                                         |
| FASTQ reads per file | 4000                                                                                                  |
| BAM output           | Off                                                                                                   |
| Bulk file output     | Off                                                                                                   |
| Data location        | /data./20230807_AHRI5sig<br>sputumzTB/no_sample/202<br>30807_0816_MC-<br>114017_FAW08908_f8863b<br>05 |

### SOFTWARE VERSIONS

|               |         |
|---------------|---------|
| MinKNOW       | 22.12.5 |
| Bream         | 7.4.8   |
| Configuration | 5.4.7   |
| Guppy         | 6.4.6   |
| MinKNOW Core  | 5.4.3   |

# Sequence output

## READ LENGTHS · OUTLIERS REMOVED

The read length graph shows the total number of bases vs the read length. The longest 1% of strands are classified as outliers, and excluded to allow focus on the main body of data.

Legend

■ Basecalled — Estimated

Estimated N50

873

% Basecalled

100%

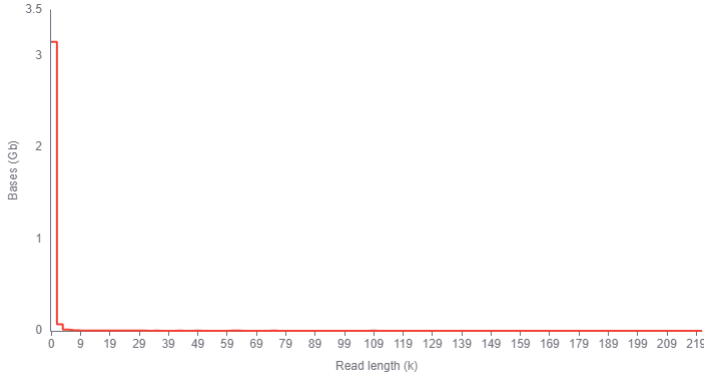

## OUTLIERS

The longest 1% of strands are classified as outliers, and aggregated into groups to show their relative amounts.

| Read length (kb) | Aggregated reads (Mb) |
|------------------|-----------------------|
| 0 - 128          | 28.31                 |
| 128 - 256        | 0.15                  |
| 256 - 384        | None                  |
| 384 - 492        | 0.5                   |

## BARCODED READS

The total number of bases for each barcode is calculated and displayed below.

| Total bases (Gb) | Barcodes                                                                                                                        |
|------------------|---------------------------------------------------------------------------------------------------------------------------------|
| 0-1              | barcode01 (Reads: 270312) barcode02 (Reads: 279151) barcode03 (Reads: 258272) barcode04 (Reads: 299275)                         |
|                  | barcode05 (Reads: 327746) barcode06 (Reads: 313714) barcode07 (Reads: 330402) barcode08 (Reads: 320241)                         |
|                  | barcode09 (Reads: 324697) barcode10 (Reads: 337639) barcode11 (Reads: 638903) barcode12 (Reads: 302724) barcode13 (Reads: 6537) |
|                  | barcode14 (Reads: 1) barcode15 (Reads: 4) barcode16 (Reads: 1) barcode17 (Reads: 2) barcode18 (Reads: 7) barcode19 (Reads: 0)   |
|                  | barcode20 (Reads: 1) barcode21 (Reads: 3) barcode22 (Reads: 8) barcode23 (Reads: 0) barcode24 (Reads: 4) barcode25 (Reads: 1)   |
|                  | barcode26 (Reads: 2) barcode27 (Reads: 2) barcode28 (Reads: 2) barcode29 (Reads: 3) barcode30 (Reads: 0) barcode31 (Reads: 1)   |
|                  | barcode32 (Reads: 6) barcode33 (Reads: 4) barcode34 (Reads: 4) barcode35 (Reads: 1) barcode36 (Reads: 0) barcode37 (Reads: 0)   |
|                  | barcode38 (Reads: 0) barcode39 (Reads: 2) barcode40 (Reads: 0) barcode41 (Reads: 4) barcode42 (Reads: 4) barcode43 (Reads: 2)   |
|                  | barcode44 (Reads: 2) barcode45 (Reads: 0) barcode46 (Reads: 17) barcode47 (Reads: 8) barcode48 (Reads: 6)                       |
|                  | barcode49 (Reads: 28) barcode50 (Reads: 1) barcode51 (Reads: 0) barcode52 (Reads: 5) barcode53 (Reads: 1) barcode54 (Reads: 1)  |
|                  | barcode55 (Reads: 3) barcode56 (Reads: 5) barcode57 (Reads: 2) barcode58 (Reads: 181) barcode59 (Reads: 0)                      |
|                  | barcode60 (Reads: 1) barcode61 (Reads: 2) barcode62 (Reads: 1) barcode63 (Reads: 4) barcode64 (Reads: 6) barcode65 (Reads: 5)   |
|                  | barcode66 (Reads: 5) barcode67 (Reads: 1) barcode68 (Reads: 3) barcode69 (Reads: 2) barcode70 (Reads: 3) barcode71 (Reads: 4)   |
|                  | barcode72 (Reads: 1) barcode73 (Reads: 3) barcode74 (Reads: 0) barcode75 (Reads: 2) barcode76 (Reads: 1) barcode77 (Reads: 1)   |
|                  | barcode78 (Reads: 1) barcode79 (Reads: 1) barcode80 (Reads: 1) barcode81 (Reads: 0) barcode82 (Reads: 0) barcode83 (Reads: 2)   |
|                  | barcode84 (Reads: 1) barcode85 (Reads: 0) barcode86 (Reads: 1) barcode87 (Reads: 2) barcode88 (Reads: 1) barcode89 (Reads: 2)   |
|                  | barcode90 (Reads: 0) barcode91 (Reads: 3) barcode92 (Reads: 2) barcode93 (Reads: 4) barcode94 (Reads: 1) barcode95 (Reads: 1)   |
|                  | barcode96 (Reads: 1)                                                                                                            |

## CUMULATIVE OUTPUT

The cumulative output shows the total amount of bases or reads sequenced over time by your device.

### Bases

Legend

— Estimated — Passed — Failed  
 Predicted total number of bases, prior to basecalling. Bases equal to or above the quality score threshold. Bases below the quality score threshold.

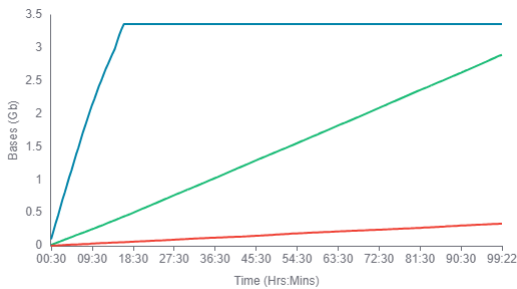

### Reads

Legend

— Total — Passed — Failed  
 Total number of reads, including passed, failed and skipped. Reads equal to or above the quality score threshold. Reads below the quality score threshold.

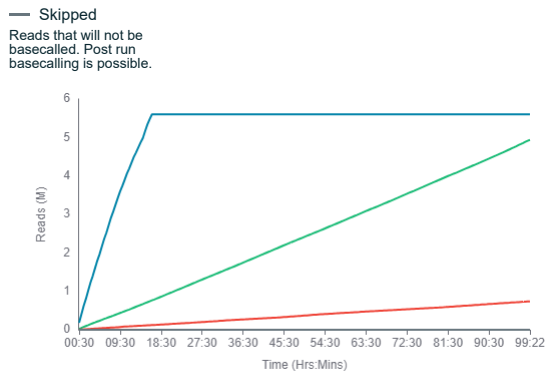

### QUALITY SCORE

The quality score is calculated as basecalling is performed on your device. Reads that fall below the minimum value of 9 will be classified as failed reads. You can alter the accepted minimum quality score in MinKNOW.

#### Legend

- Mode**  
The most frequent quality score of reads in the run.
- Spread**  
The spread of quality scores, found by calculating full width half maximum.
- Min. quality score**  
Minimum quality score to be accepted as a passed read.

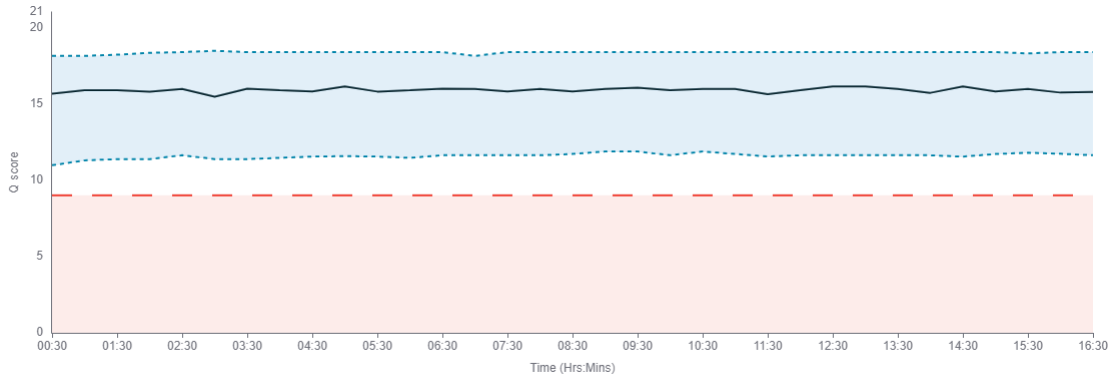

#### Troubleshooting

Quality score low  
This can be due to the translocation speed being out of the accepted range, which can correlate to low quality scores. If you see that the translocation speed is out of the accepted range in the below graph, please see the Flow Cell refuelling page linked [here](#) for further troubleshooting.

## Run health

### PORE ACTIVITY

The Pore activity graph shows the performance of your sample as it is being sequenced during a run.

#### Legend

- Sequencing**  
Pore currently sequencing
- Adapter**  
Pore currently sequencing adapter
- Pore available**  
Pore available for sequencing
- Unavailable**  
Pore unavailable for sequencing
- Active feedback**  
Channel ejecting analyte
- No pore**  
No pore detected in channel
- Out of range-high**  
Current is positive but unavailable for sequencing
- Out of range-low**  
Current is negative but unavailable for sequencing
- Multiple**  
Multiple pores detected. Unavailable for sequencing.
- Saturated**  
The channel has switched off as current levels exceed hardware limitations
- Zero**  
Pore currently unavailable for sequencing
- Channel disabled**  
Channel is disabled and awaiting another pore scan
- Unclassified**  
Pore status unknown

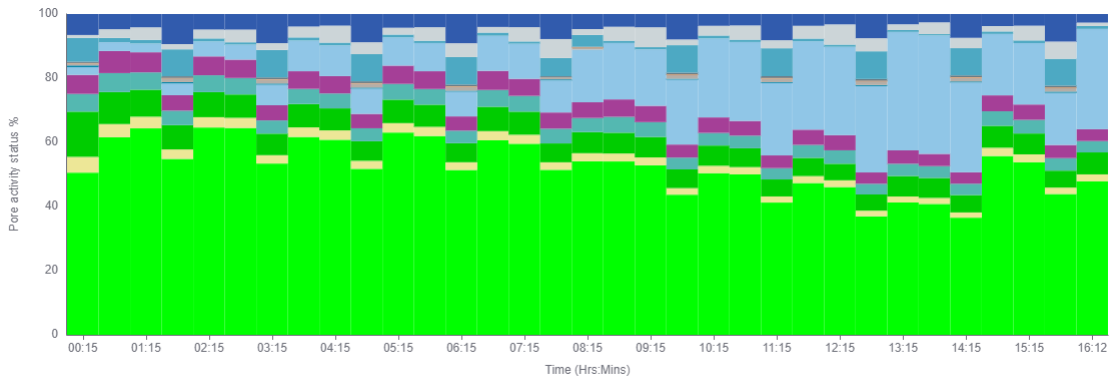

#### Troubleshooting

General  
Some commonly seen issues are excess pores classified as Recovering, Open Pore, or Free Adapter. To find out what advice is applicable for your run, visit the [user guide](#).

### PORE SCAN

A Pore scan is performed at configurable time intervals to determine the current status of pores within channels on a Flow Cell. For this run a Pore scan is performed every 1.5 hrs.

#### Legend

- **Pore available**  
Pore in channel available for sequencing
- **Reserved pore**  
Pore in reserve, will return to available when required
- **Unavailable**  
Pore inhibited from sequencing
- **Saturated**  
Possible contamination in the sample
- **Zero**  
No current is passing through this pore, possibly due to bubbles on the membrane
- **Inactive**  
Pore no longer suitable for further sequencing

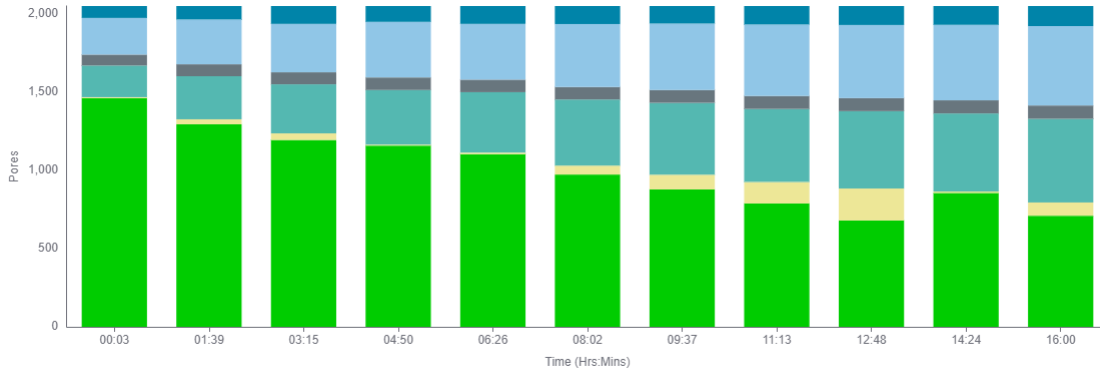

#### Troubleshooting

##### High proportion Unavailable

Possible contaminants in library blocking the pore. Consider using the Flow Cell Wash Kit, and reloading a library.

##### High proportion Inactive

If localised to one area of the Flow Cell, this could indicate that an air bubble has been introduced during the flushing/loading steps. If inactivity is spread across the Flow Cell this could be caused by improper loading of the library, please refer to the [user guide](#) for further support.

### TRANSLOCATION SPEED

The translocation speed is the rate at which DNA/RNA travels through pores as it is being sequenced.

#### Legend

- Median
- - - 75% quartile
- - - 25% quartile
- Accepted range

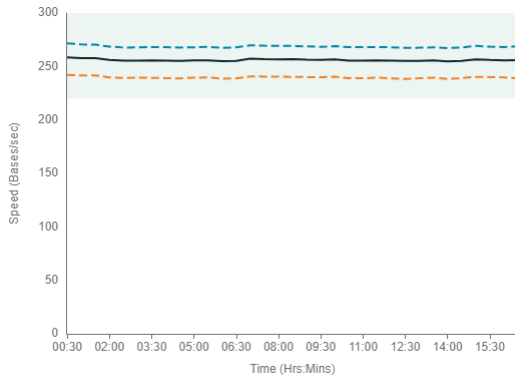

#### Troubleshooting

##### Low speed

Check that the Flow Cell is within the target temperature range.

##### Note

Low-quality and short reads are not included in this graph.

### TEMPERATURE

The temperature of the Flow Cell over the run time.

#### Legend

- Measured
- Target

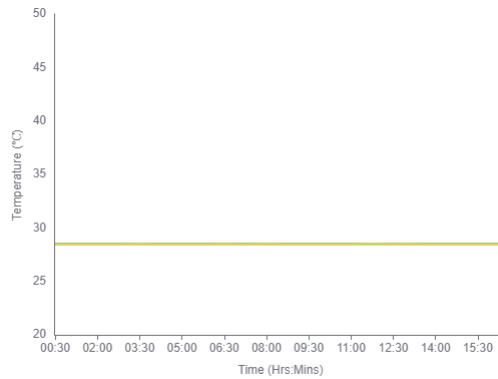

#### Troubleshooting

##### Out of range

Check that the Flow Cell is correctly seated and firmly pushed down into the device. Ensure ambient temperature is always within the specified range for your device in the [user guide](#).

Air flow should be good but not excessive. Excessive amounts of cool air blowing on the device could prevent it from reaching target temperature.

## Run log

### SYSTEM MESSAGES

System messages are a record of the events that occurred in the time covered by this report.

#### Errors

None

#### Warnings

**Disk usage alert** · 07 Aug 23, 20:03

Disk usage alert – you only have 197 GB of space free, which is insufficient for the run. Please free up some space, otherwise your run will stop in approximately 1d 12h 10m.

#### Events

**Disk space** · 07 Aug 23, 08:16

Disk /data has 247 GB space remaining

**Waiting for temperature** · 07 Aug 23, 08:16

Waiting up to 300 seconds for temperature to stabilise at 28.5°C

**Starting** · 07 Aug 23, 08:17

Starting sequencing procedure

**Pore scan starting** · 07 Aug 23, 08:17

Performing Pore Scan

**Pore scan result** · 07 Aug 23, 08:21

Pore scan for flow cell FAW08908 has found a total of 1466 pores. 498 pores available for immediate sequencing

**Pore scan starting** · 07 Aug 23, 09:52

Performing Pore Scan

**Pore scan result** · 07 Aug 23, 09:56

Pore scan for flow cell FAW08908 has found a total of 1325 pores. 488 pores available for immediate sequencing

**Pore scan starting** · 07 Aug 23, 11:28

Performing Pore Scan

**Pore scan result** · 07 Aug 23, 11:32

Pore scan for flow cell FAW08908 has found a total of 1235 pores. 463 pores available for immediate sequencing

**Pore scan starting** · 07 Aug 23, 13:03

Performing Pore Scan

**Pore scan result** · 07 Aug 23, 13:08

Pore scan for flow cell FAW08908 has found a total of 1163 pores. 467 pores available for immediate sequencing

**Pore scan starting** · 07 Aug 23, 14:39

Performing Pore Scan

**Pore scan result** · 07 Aug 23, 14:43

Pore scan for flow cell FAW08908 has found a total of 1112 pores. 456 pores available for immediate sequencing

**Pore scan starting** · 07 Aug 23, 16:14

Performing Pore Scan

**Pore scan result** · 07 Aug 23, 16:19

Pore scan for flow cell FAW08908 has found a total of 1029 pores. 422 pores available for immediate sequencing

**Pore scan starting** · 07 Aug 23, 17:50

Performing Pore Scan

**Pore scan result** · 07 Aug 23, 17:54

Pore scan for flow cell FAW08908 has found a total of 971 pores. 386 pores available for immediate sequencing

**Pore scan starting** · 07 Aug 23, 19:26

Performing Pore Scan

**Pore scan result** · 07 Aug 23, 19:30

Pore scan for flow cell FAW08908 has found a total of 925 pores. 371 pores available for immediate sequencing

**Pore scan starting** · 07 Aug 23, 21:01

Performing Pore Scan

**Pore scan result** · 07 Aug 23, 21:06

Pore scan for flow cell FAW08908 has found a total of 883 pores. 323 pores available for immediate sequencing

**Pore scan starting** · 07 Aug 23, 22:37

Performing Pore Scan

**Pore scan result** · 07 Aug 23, 22:41

Pore scan for flow cell FAW08908 has found a total of 864 pores. 414 pores available for immediate sequencing

**Pore scan starting** · 08 Aug 23, 00:12

Performing Pore Scan

**Pore scan result** · 08 Aug 23, 00:17

Pore scan for flow cell FAW08908 has found a total of 794 pores. 352 pores available for immediate sequencing

**Message** · 08 Aug 23, 00:56

Flow cell disconnected

## UNIT ABBREVIATIONS

|          |    |
|----------|----|
| Byte     | B  |
| Kilobyte | KB |
| Megabyte | MB |
| Gigabyte | GB |
| Terabyte | TB |

|          |    |
|----------|----|
| Base     | b  |
| Kilobase | kb |
| Megabase | Mb |
| Gigabase | Gb |
| Terabase | Tb |

|         |      |
|---------|------|
| Minutes | mins |
| Hours   | hrs  |
